# Supplementary material for: A New, Rapid, Colorimetric Chemodosimeter, 4(pyrrol-1-Yl)pyridine, for Nitrite Detection in Aqueous Solution
Source: Preprints.org preprint supplement (doi:10.20944/preprints202312.0412.v1), 2023-12-06

# A new, rapid, colorimetric chemodosimeter, 4(pyrrol-1-yl)pyridine, for nitrite detection in aqueous solution

Mallory E. Thomas, Lynn D. Schmitt, Alistair J. Lees

## Supplementary Information

S1:  $^1\text{H}$  NMR of dilute (<10% v/v) 4(pyrrol-1-yl)pyridine in  $\text{CDCl}_3$  with integrations

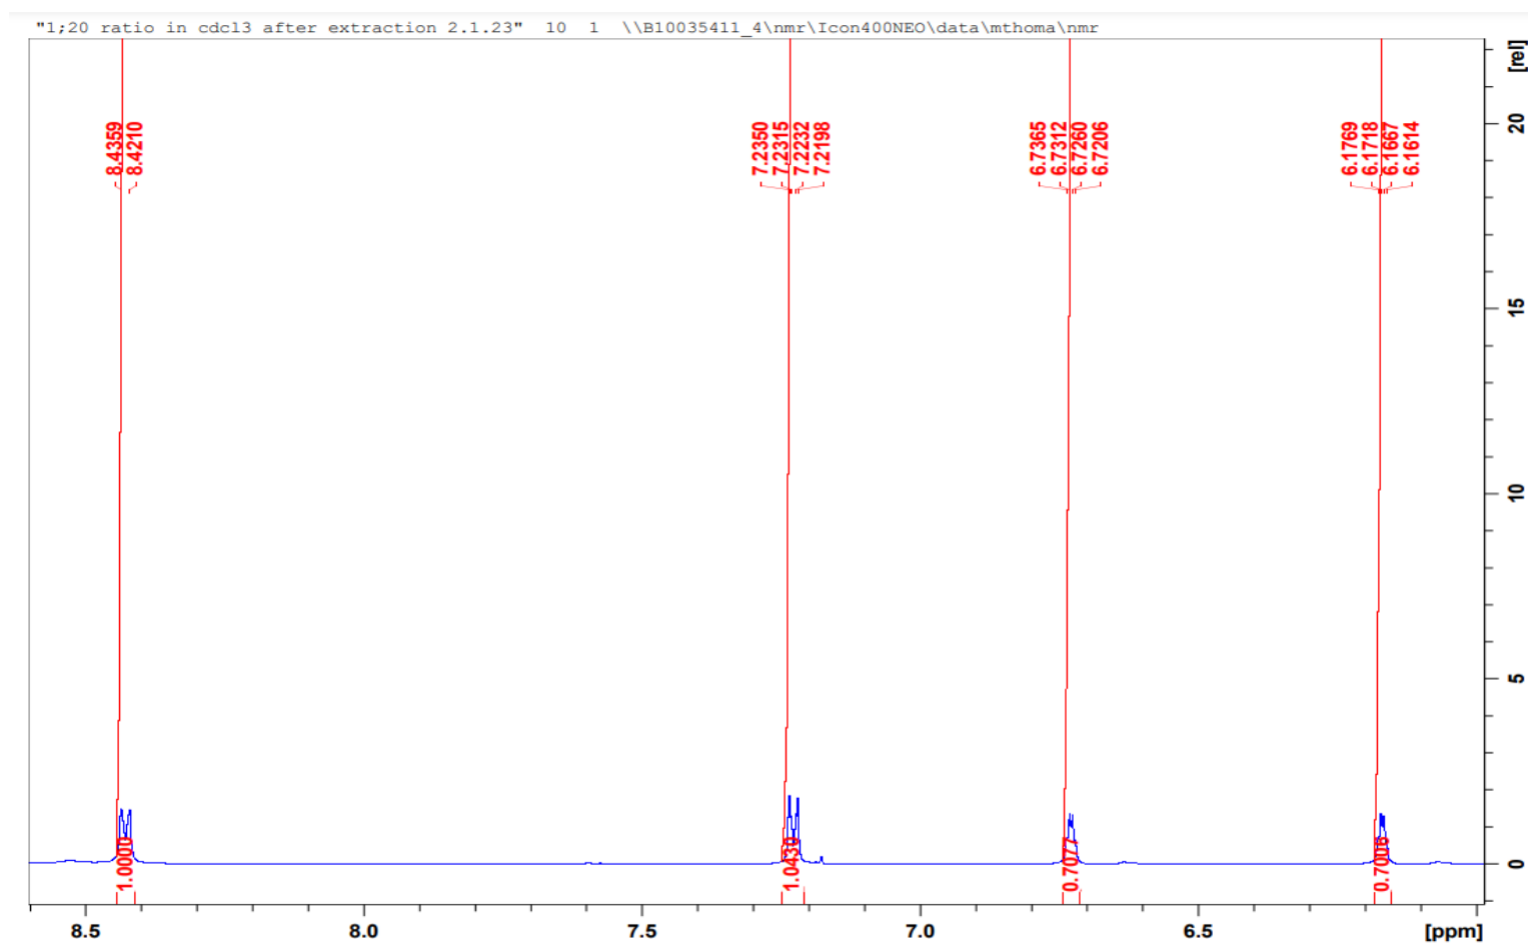

S2:  $^{13}\text{C}$  NMR of 4(pyrrol-1-yl)pyridine in  $\text{CDCl}_3$  with peak locations from NMR solvent

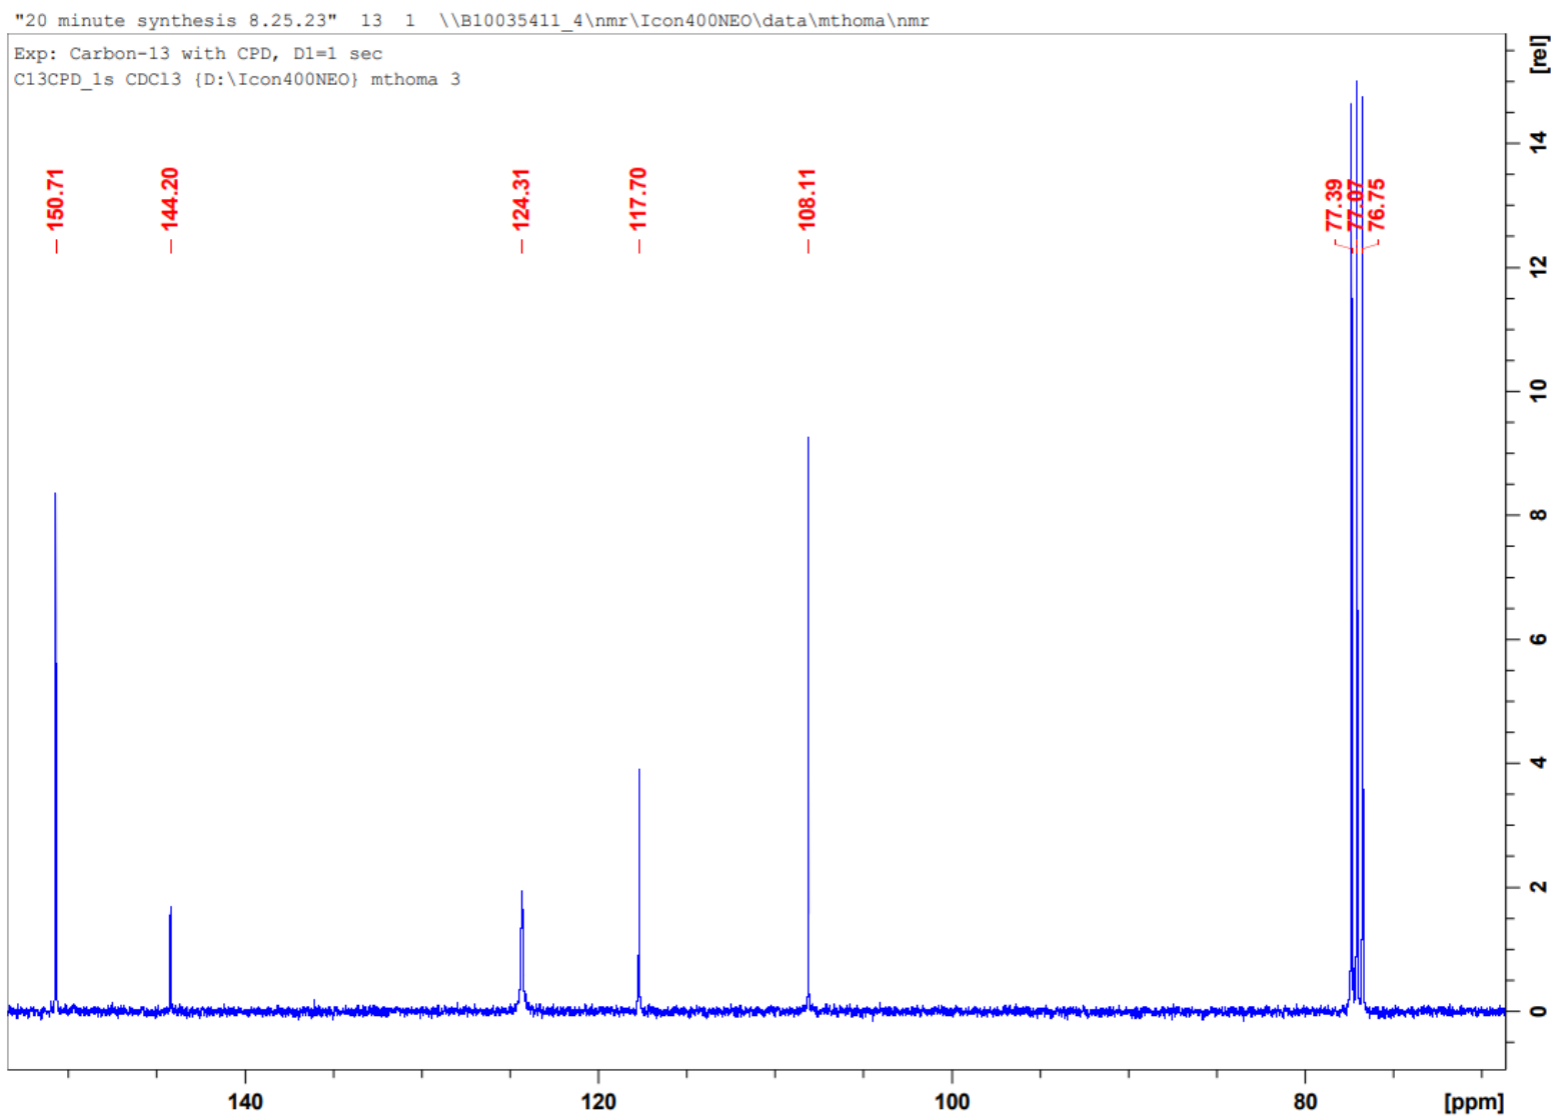

S3: DEPT 90  $^{13}\text{C}$  NMR of 4(pyrrol-1-yl)pyridine in  $\text{CDCl}_3$ . Peak observed at 53.85 ppm is indicative of residual dichloromethane following extraction. Quaternary carbons do not appear in the spectrum.

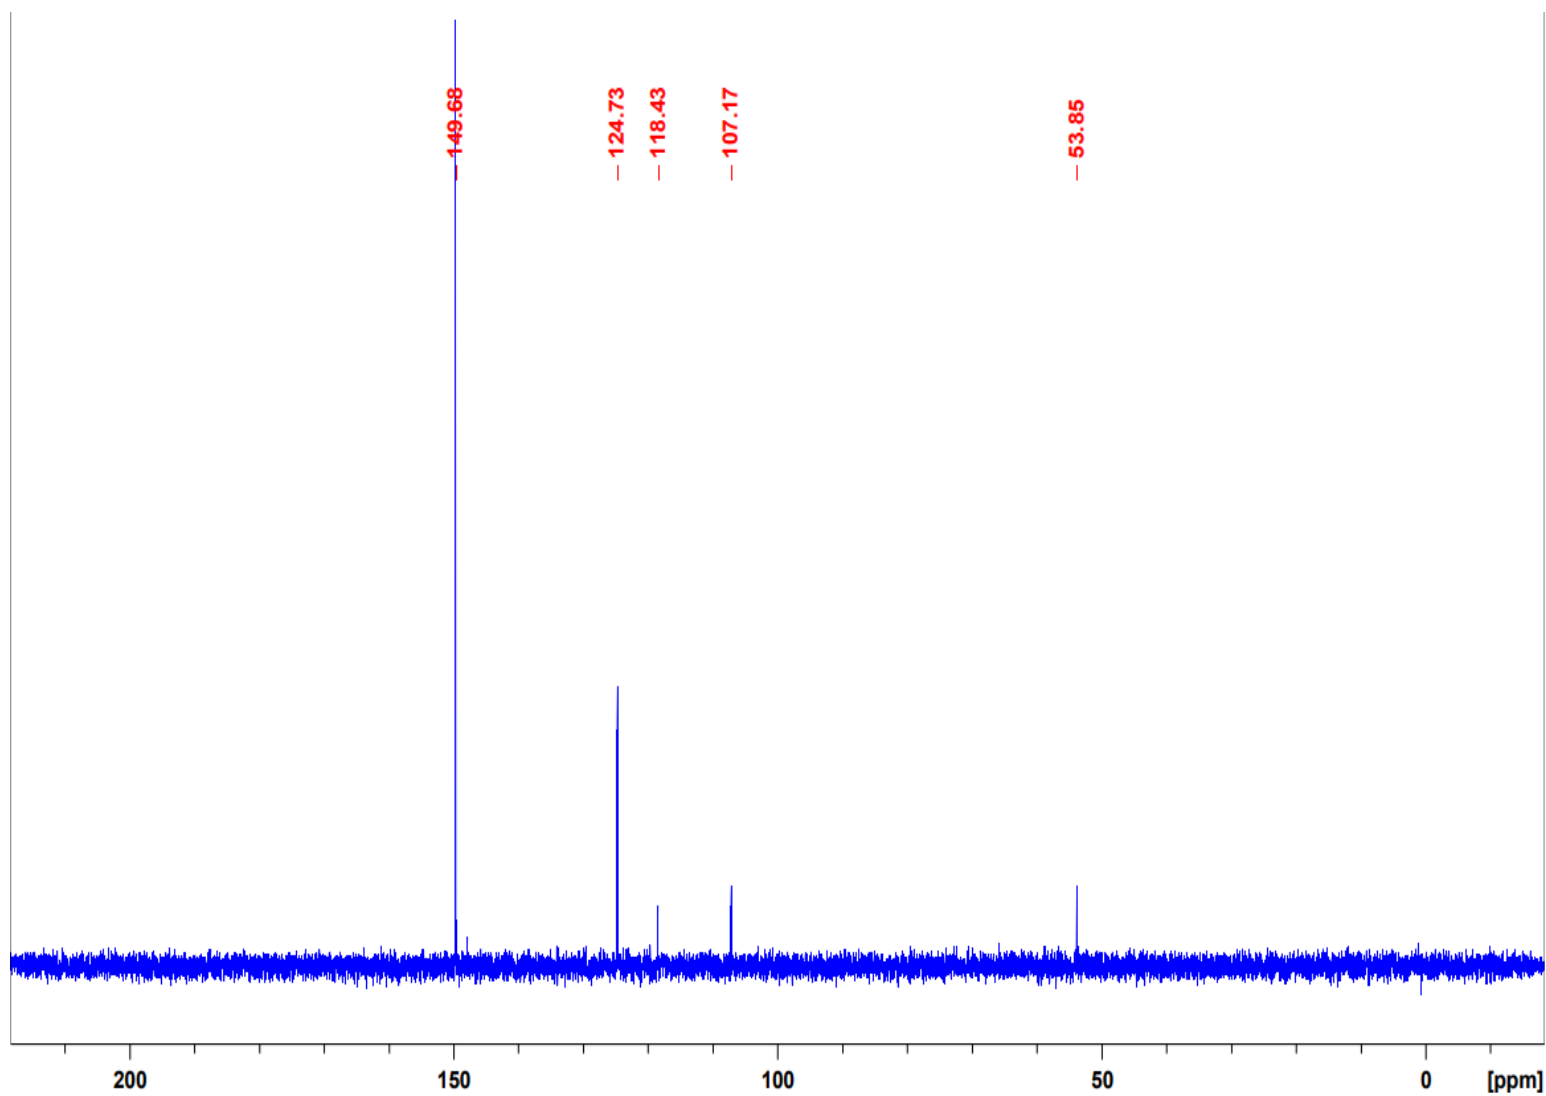

S4: HSQC NMR of dilute (<10% v/v) 4(pyrrol-1-yl)pyridine in CDCl<sub>3</sub>. Peak observed at 5.2 ppm is indicative of residual dichloromethane following extraction.

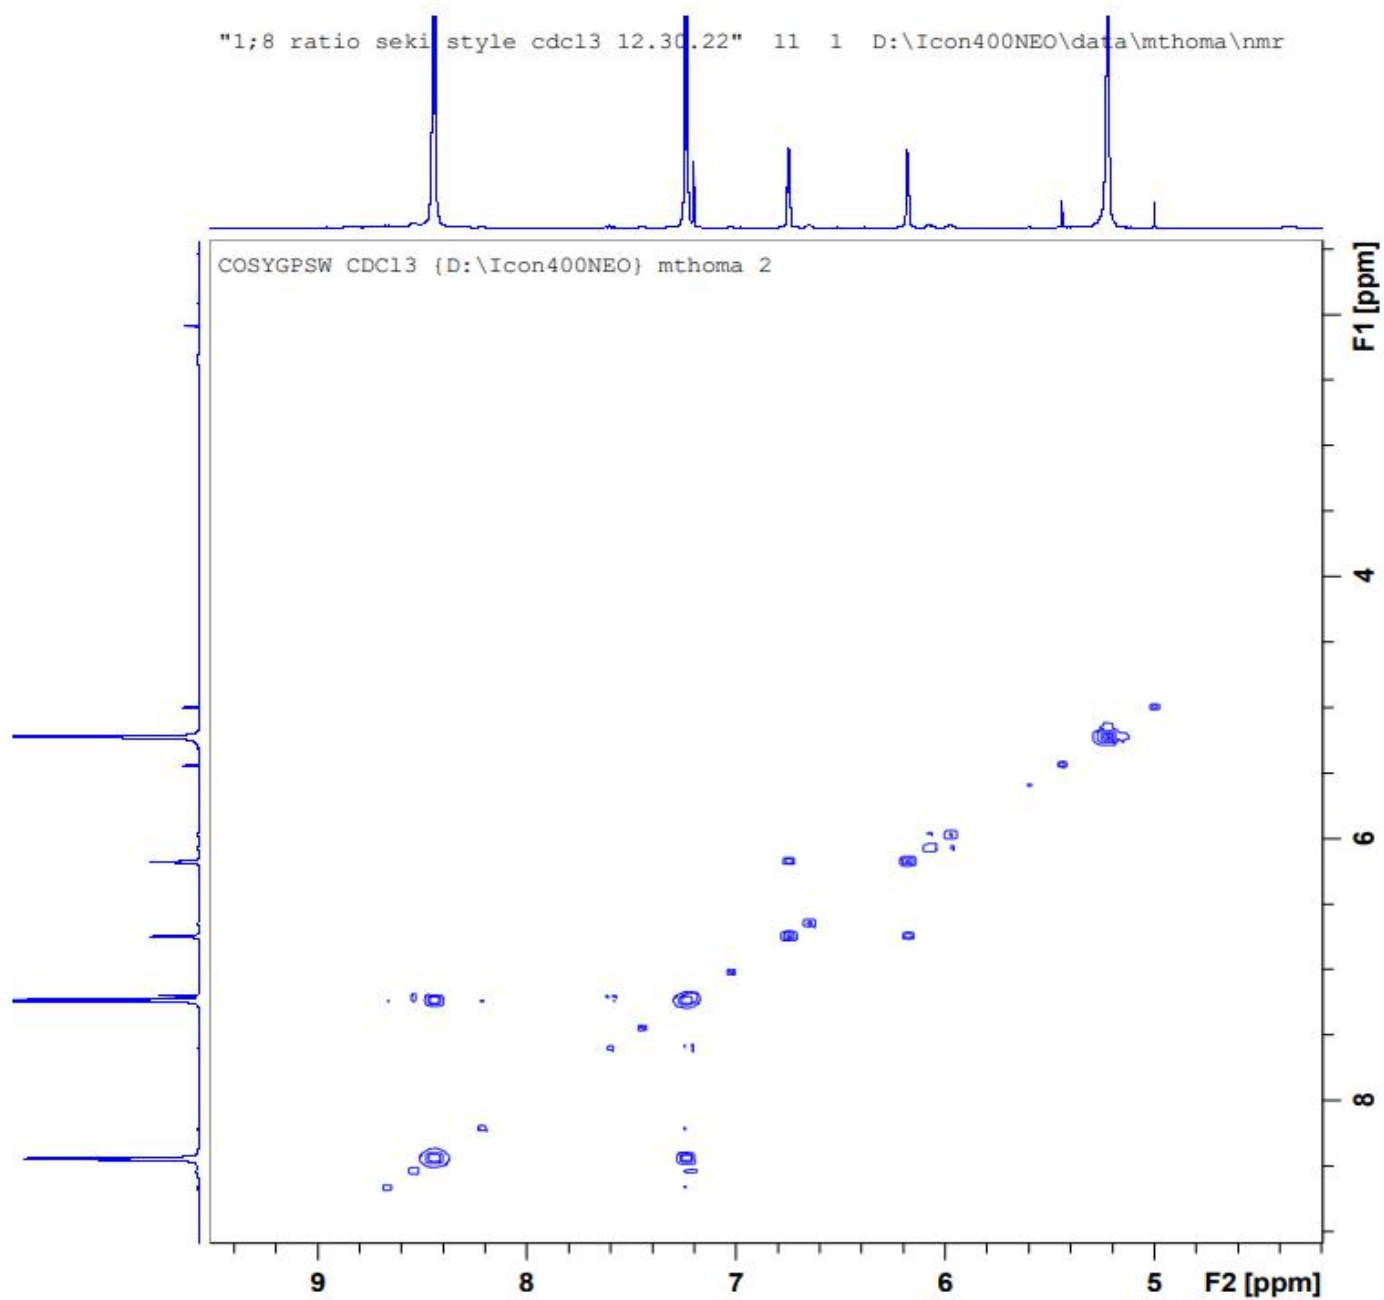

S5: COSY NMR of dilute (<10% v/v) 4(pyrrol-1-yl)pyridine in CDCl<sub>3</sub>. Peak observed at 5.2 ppm is indicative of residual dichloromethane following extraction

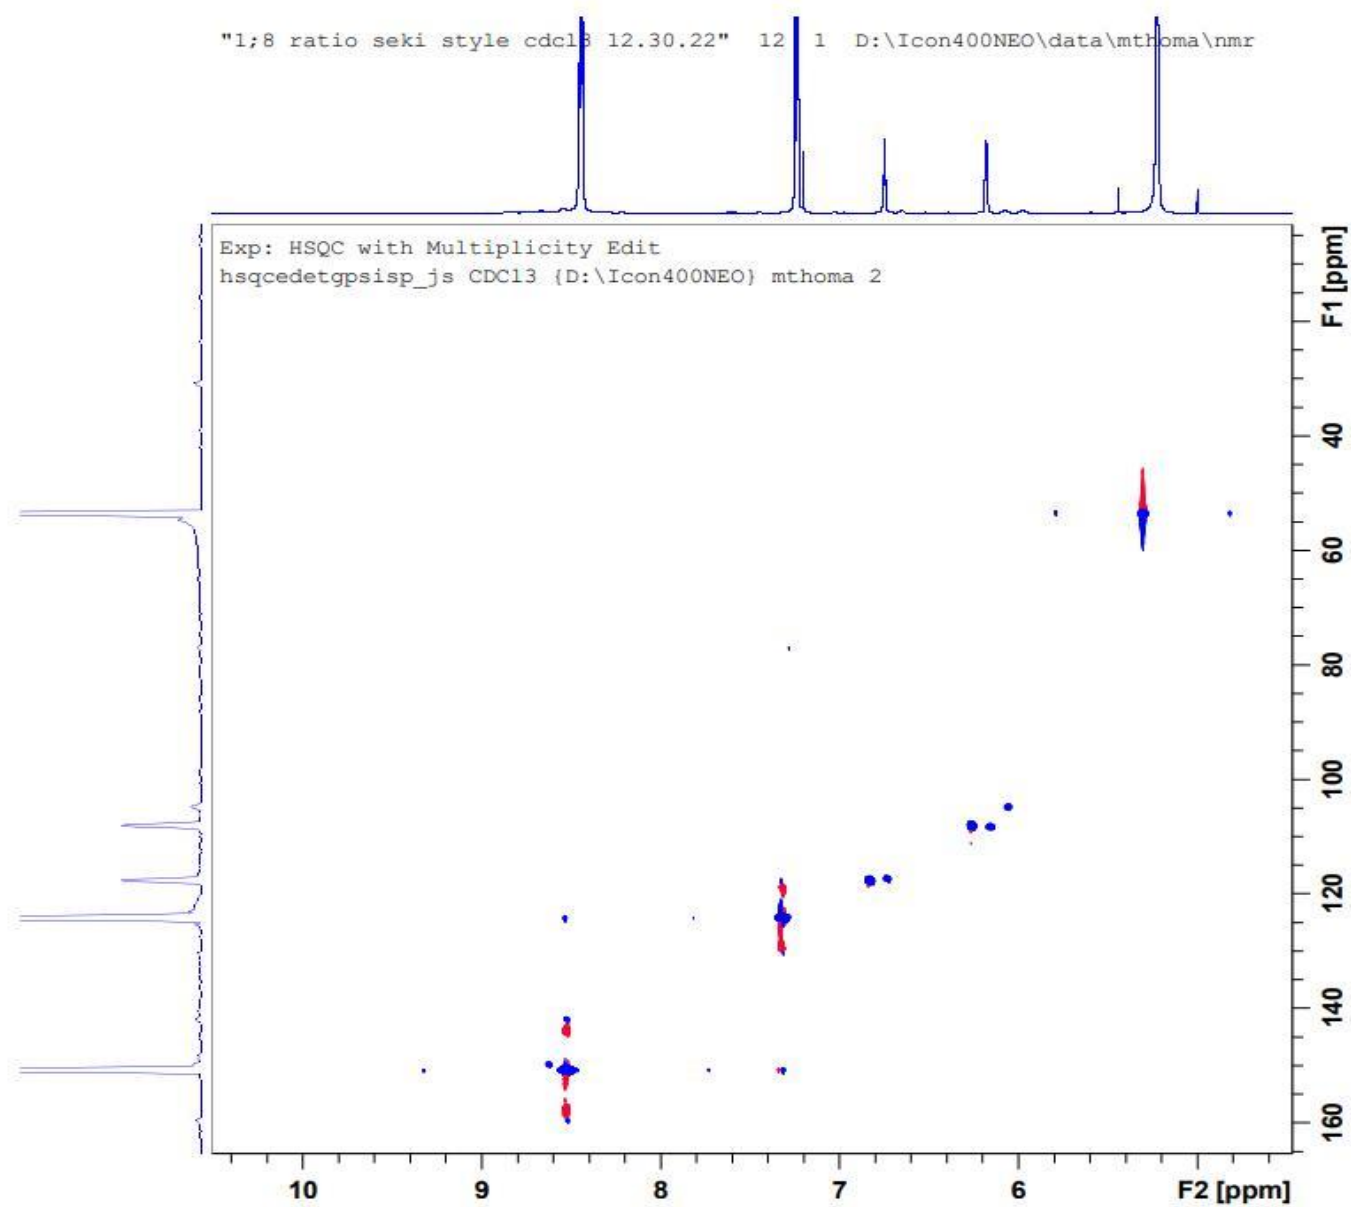

S6:  $^1\text{H}$  NMR of 10% (v/v) 4(pyrrol-1-yl)pyridine in  $\text{CDCl}_3$ . Solvent peak observed at 7.24ppm.

"10% sample cdc13 9.15.23" 10 1 \\B10035411\_4\nmr\Icon400NEO\data\mthoma\nmr

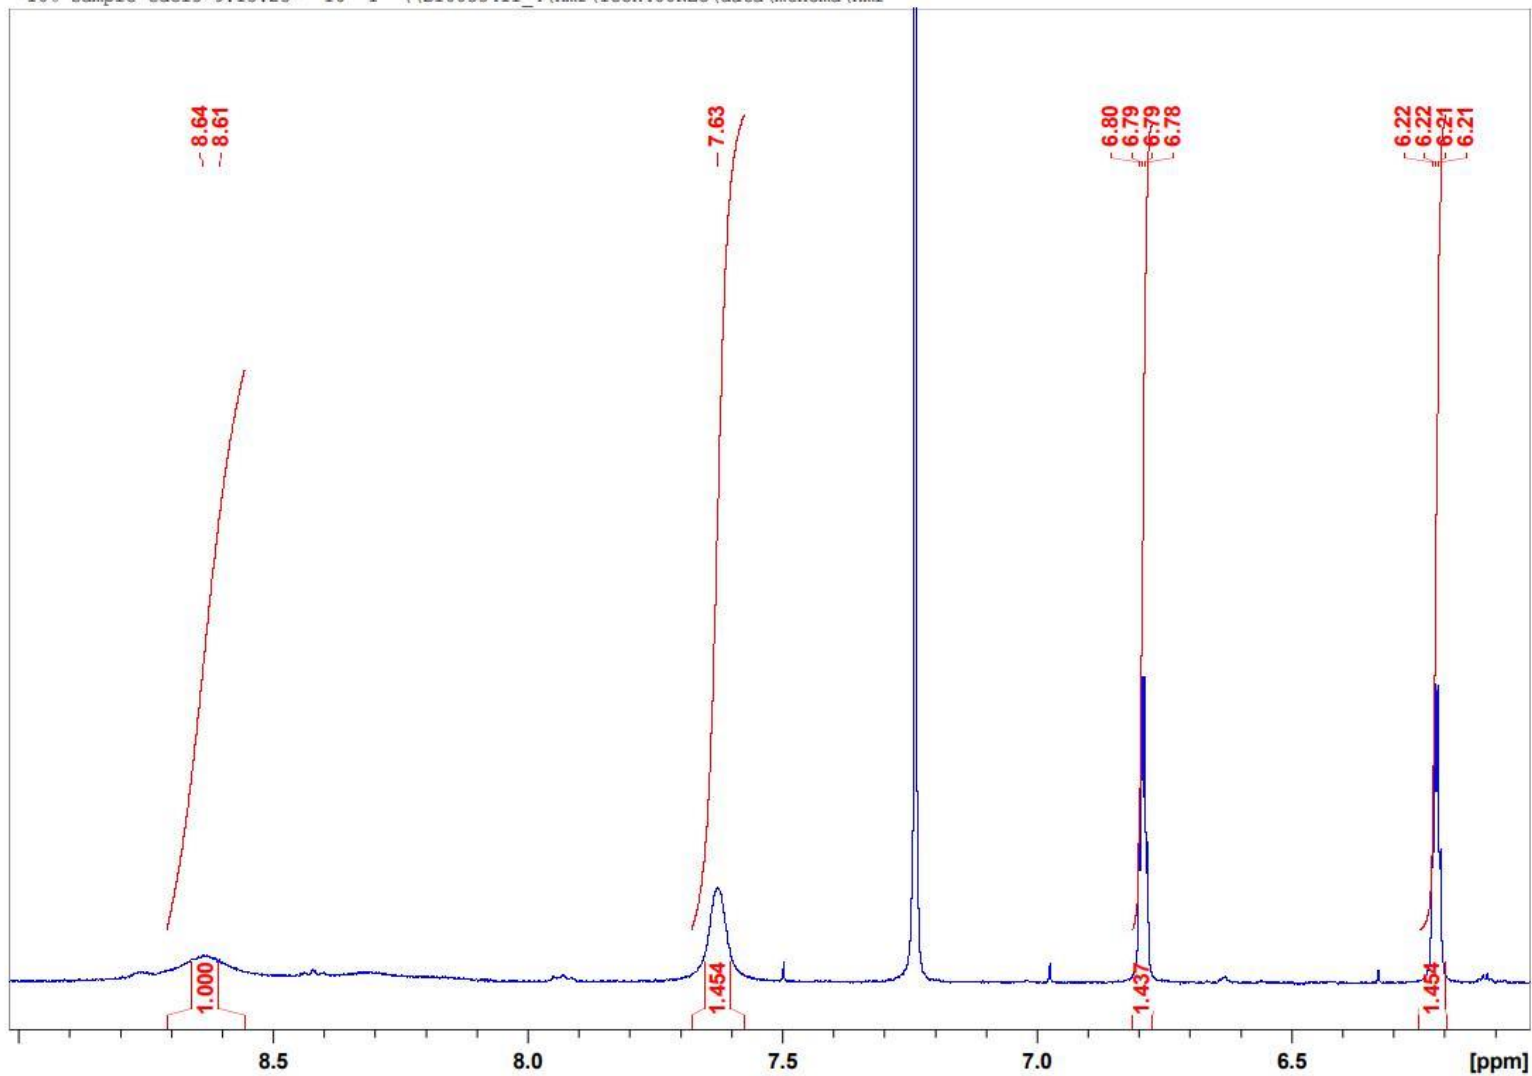

S7:  $^1\text{H}$  NMR of 40% (v/v) 4(pyrrol-1-yl)pyridine in  $\text{CDCl}_3$ . Solvent peak observed at 7.24ppm.

"40% sample cdc13 9.15.23" 10 1 \\B10035411\_4\nmr\Icon400NEO\data\mthoma\nmr

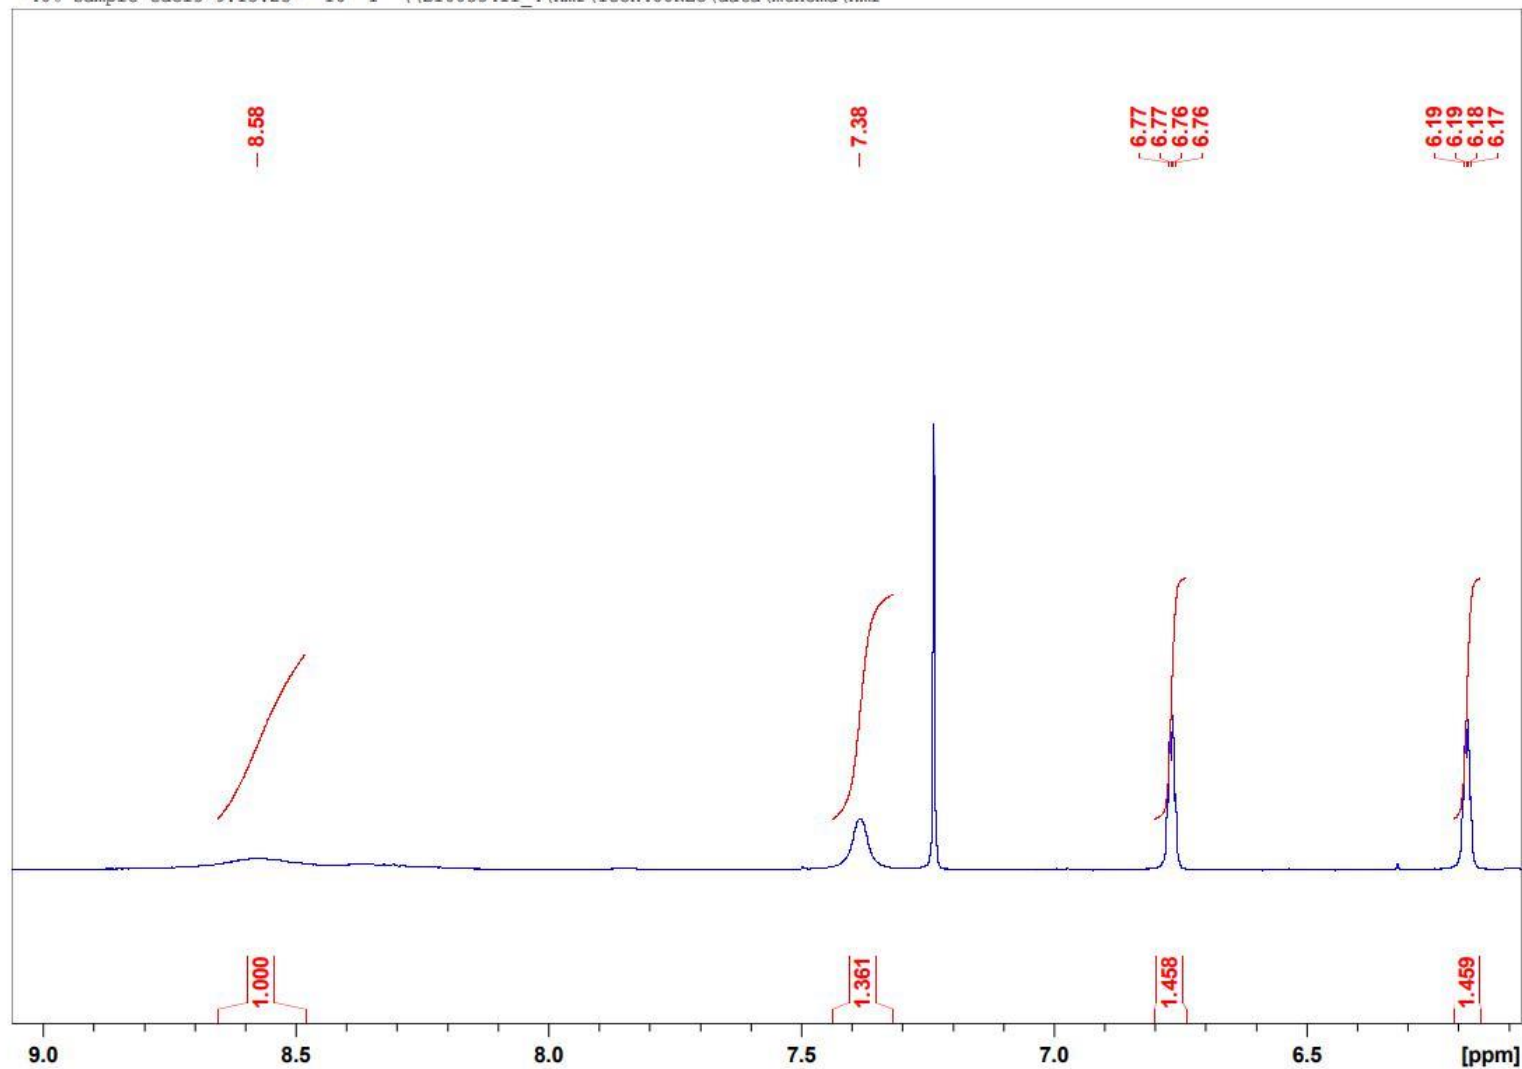

S8:  $^1\text{H}$  NMR of dilute 4(pyrrol-1-yl)pyridine and nitrite final product in  $\text{D}_2\text{O}/\text{H}_2\text{O}$ . Solvent peak observed at 4.80 ppm.

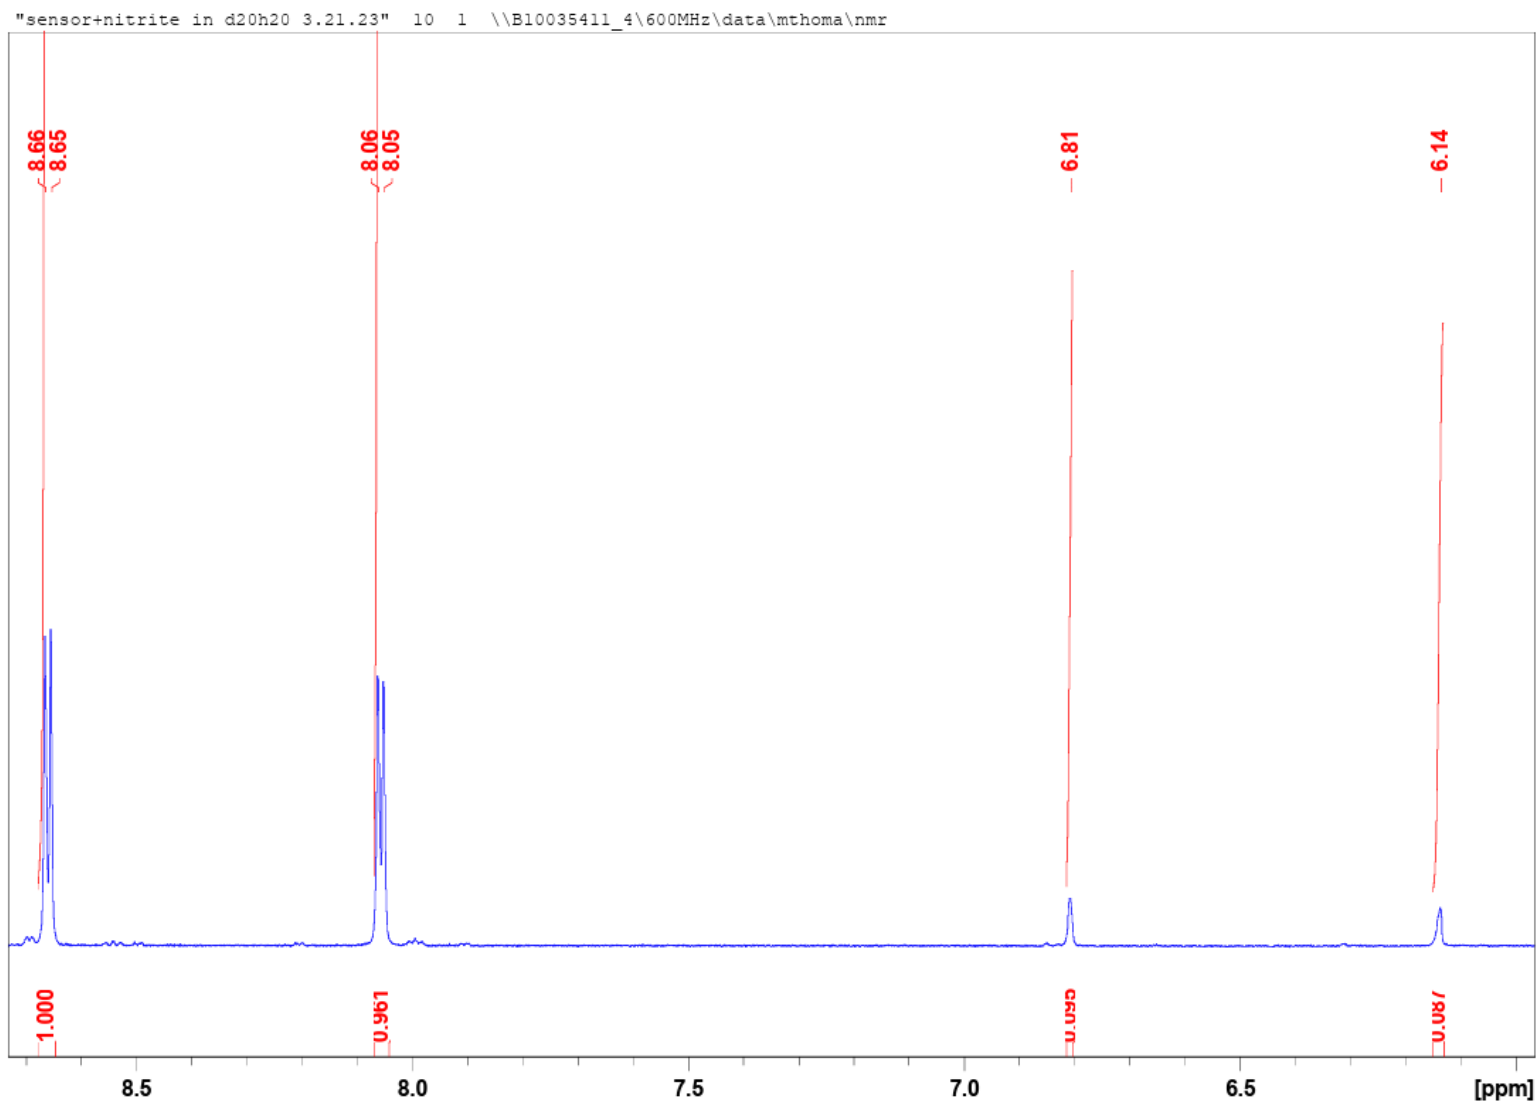



S9: COSY NMR for dilute 4(pyrrol-1-yl)pyridine and nitrite final product in D<sub>2</sub>O/H<sub>2</sub>O. Solvent peak appearing at 4.80 ppm.

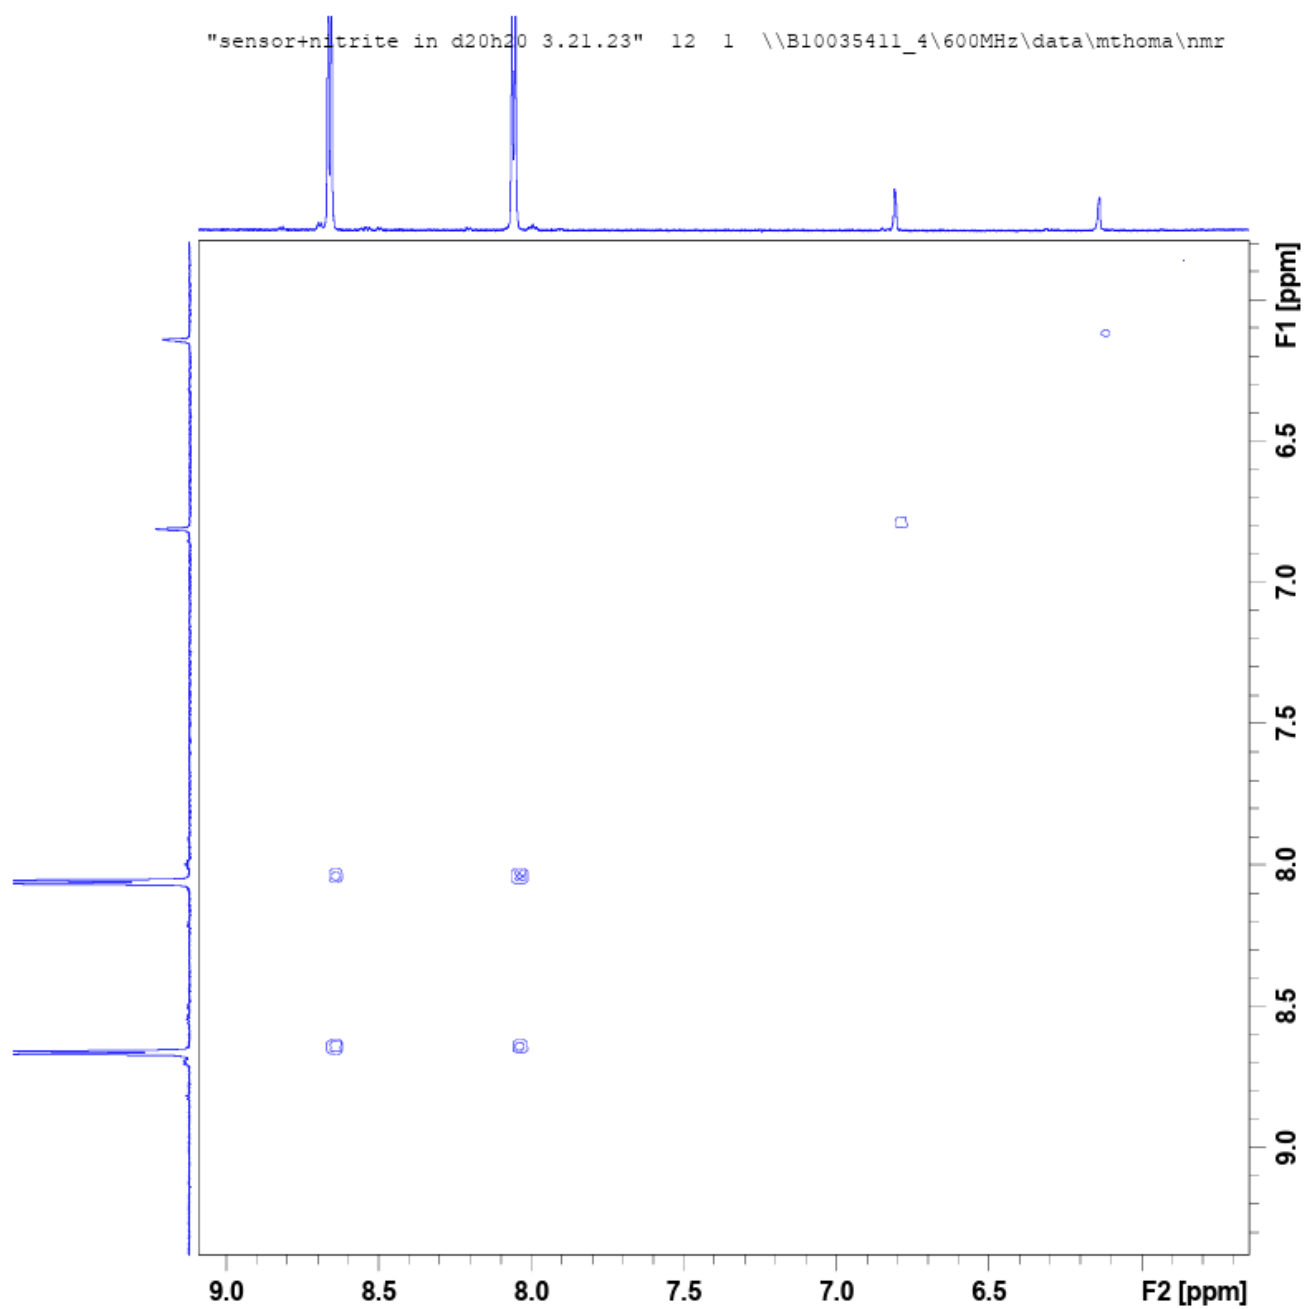

Supplement: Supplementary file 1 [file supplementary]
